# Supplementary material for: Determination of Multi-Class Antimicrobial Residues and Antimicrobial Resistance in Cow Milk and Feces Samples during Withdrawal Period
Source: MDPI journal article supplement (doi:10.3390/ani13233603), 2023-11-22
Supplement: s1 [file s1]

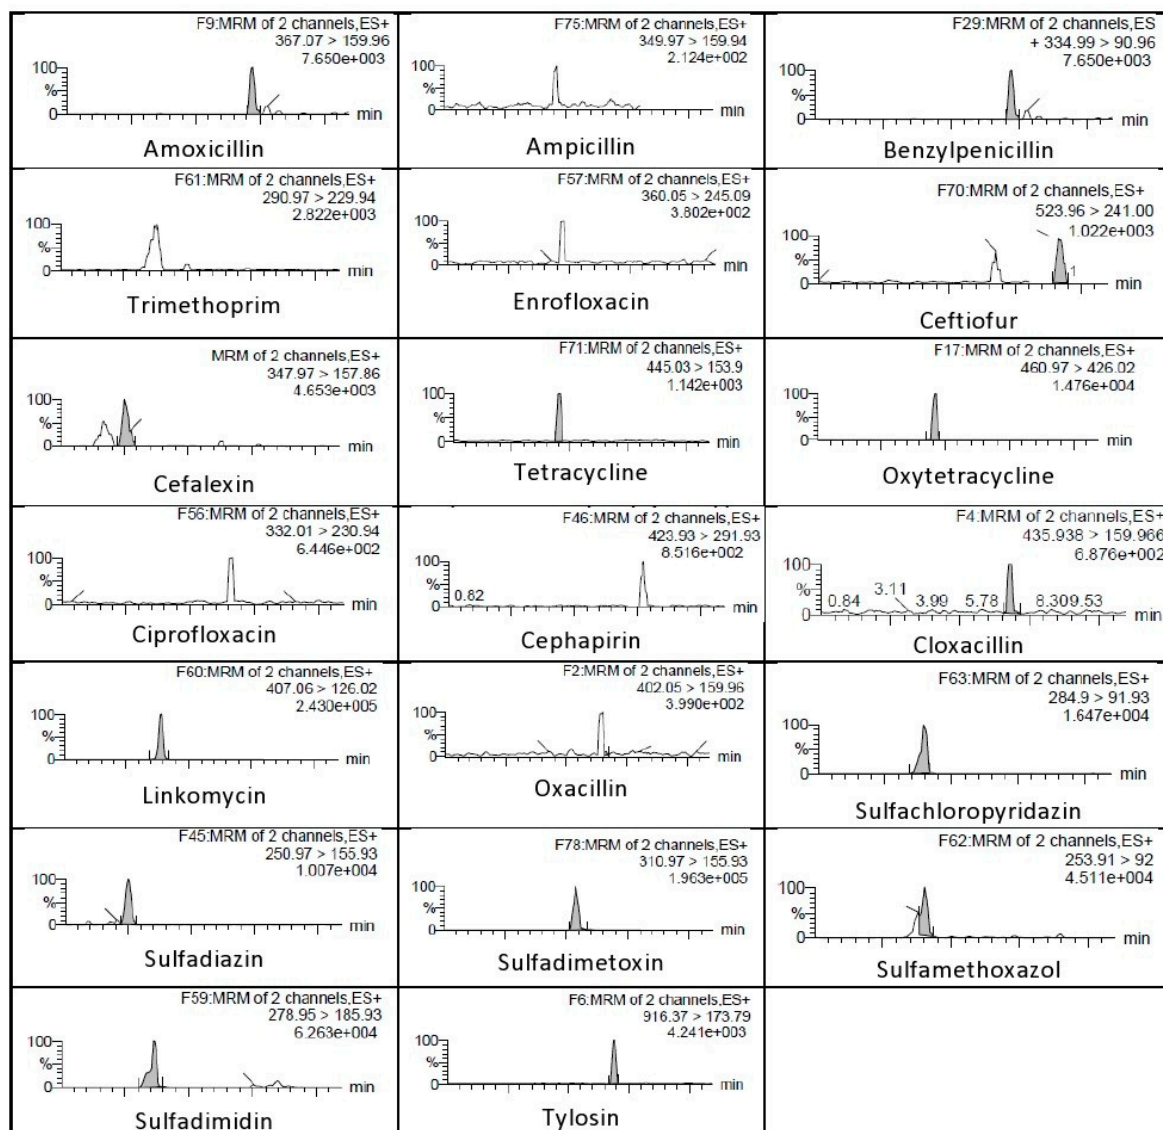

**Figure S1.** The chromatograms of spiked feces samples

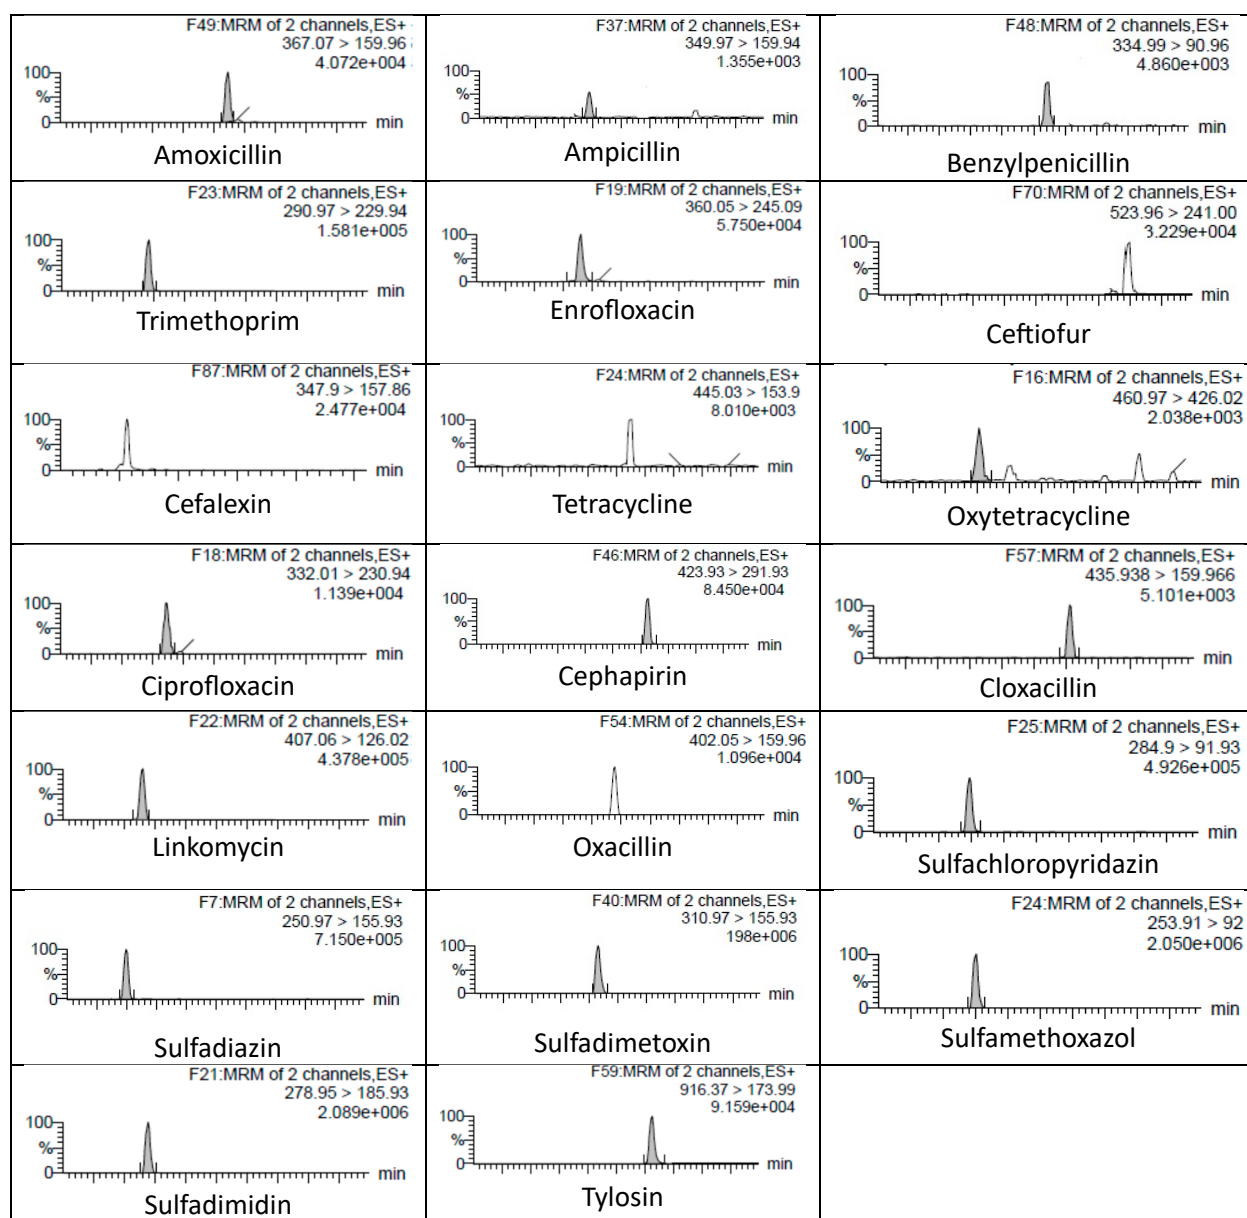

**Figure S2.** The chromatograms of spiked milk samples
